# Supplementary material for: Automatic mechanism generation for pyrolysis of di-tert-butyl sulfide
Source: Royal Society of Chemistry journal article supplement (doi:10.1039/c6cp02202b), 2016-01-01
Supplement: c6cp02202b3.pdf [file c6cp02202b3.pdf]

## RMG Output

### Species (51)

| Index | Thermo<br>H298 (kcal/mol), S298 (cal/mol*K), Cp<br>(cal/mol*K) |             |              |              |               |               | Structure                                                                           | Label     | SMILES            | MW<br>(g/mol) |
|-------|----------------------------------------------------------------|-------------|--------------|--------------|---------------|---------------|-------------------------------------------------------------------------------------|-----------|-------------------|---------------|
| -1.   | <b>H298</b>                                                    | <b>S298</b> | <b>Cp300</b> | <b>Cp500</b> | <b>Cp1000</b> | <b>Cp1500</b> | Ar                                                                                  | Ar        | [Ar]              | 39.35         |
|       | -0.00                                                          | 37.01       | 4.97         | 4.97         | 4.97          | 4.97          |                                                                                     |           |                   |               |
| -1.   | <b>H298</b>                                                    | <b>S298</b> | <b>Cp300</b> | <b>Cp500</b> | <b>Cp1000</b> | <b>Cp1500</b> | He                                                                                  | He        | [He]              | 4.00          |
|       | -0.00                                                          | 30.15       | 4.97         | 4.97         | 4.97          | 4.97          |                                                                                     |           |                   |               |
| -1.   | <b>H298</b>                                                    | <b>S298</b> | <b>Cp300</b> | <b>Cp500</b> | <b>Cp1000</b> | <b>Cp1500</b> | Ne                                                                                  | Ne        | [Ne]              | 20.18         |
|       | -0.00                                                          | 34.97       | 4.97         | 4.97         | 4.97          | 4.97          |                                                                                     |           |                   |               |
| -1.   | <b>H298</b>                                                    | <b>S298</b> | <b>Cp300</b> | <b>Cp500</b> | <b>Cp1000</b> | <b>Cp1500</b> | $\text{N}\equiv\text{N}$                                                            | N2        | N#N               | 28.01         |
|       | -0.00                                                          | 45.79       | 6.96         | 7.07         | 7.81          | 8.31          |                                                                                     |           |                   |               |
| 1.    | <b>H298</b>                                                    | <b>S298</b> | <b>Cp300</b> | <b>Cp500</b> | <b>Cp1000</b> | <b>Cp1500</b> |  | DTBS(1)   | CC(C)(C)SC(C)(C)C | 146.29        |
|       | -45.07                                                         | 106.76      | 52.54        | 77.08        | 110.96        | 126.50        |                                                                                     |           |                   |               |
| 2.    | <b>H298</b>                                                    | <b>S298</b> | <b>Cp300</b> | <b>Cp500</b> | <b>Cp1000</b> | <b>Cp1500</b> | H <sub>2</sub> S                                                                    | H2S(2)    | S                 | 34.08         |
|       | -4.90                                                          | 49.18       | 8.18         | 8.88         | 10.93         | 12.29         |                                                                                     |           |                   |               |
| 3.    | <b>H298</b>                                                    | <b>S298</b> | <b>Cp300</b> | <b>Cp500</b> | <b>Cp1000</b> | <b>Cp1500</b> |  | C4H8(3)   | C=C(C)C           | 56.11         |
|       | -3.80                                                          | 69.99       | 21.54        | 31.20        | 46.91         | 54.64         |                                                                                     |           |                   |               |
| 4.    | <b>H298</b>                                                    | <b>S298</b> | <b>Cp300</b> | <b>Cp500</b> | <b>Cp1000</b> | <b>Cp1500</b> |  | C4H9SH(4) | CC(C)(C)S         | 90.19         |
|       | -25.99                                                         | 83.68       | 30.57        | 42.84        | 59.68         | 68.12         |                                                                                     |           |                   |               |
| 5.    | <b>H298</b>                                                    | <b>S298</b> | <b>Cp300</b> | <b>Cp500</b> | <b>Cp1000</b> | <b>Cp1500</b> |  | C4H10(5)  | CC(C)C            | 58.12         |
|       | -32.50                                                         | 70.43       | 23.06        | 35.25        | 54.22         | 63.87         |                                                                                     |           |                   |               |
| 6.    | <b>H298</b>                                                    | <b>S298</b> | <b>Cp300</b> | <b>Cp500</b> | <b>Cp1000</b> | <b>Cp1500</b> |  | C6H10(6)  | C1=CCCCC1         | 82.14         |
|       | -1.03                                                          | 74.20       | 24.44        | 41.15        | 65.49         | 76.90         |                                                                                     |           |                   |               |
| 7.    | <b>H298</b>                                                    | <b>S298</b> | <b>Cp300</b> | <b>Cp500</b> | <b>Cp1000</b> | <b>Cp1500</b> | S=S                                                                                 | S2(7)     | S=S               | 64.13         |
|       | 47.12                                                          | 53.78       | 7.82         | 8.39         | 8.75          | 8.88          |                                                                                     |           |                   |               |

|     |                                            |                                                                                     |            |                       |        |
|-----|--------------------------------------------|-------------------------------------------------------------------------------------|------------|-----------------------|--------|
| 8.  | <b>H298 S298 Cp300 Cp500 Cp1000 Cp1500</b> | $\cdot\text{S}-\text{S}\cdot$                                                       | S2JJ(8)    | [S][S]                | 64.13  |
|     | 30.74 54.54 7.80 8.35 8.91 9.32            |                                                                                     |            |                       |        |
| 9.  | <b>H298 S298 Cp300 Cp500 Cp1000 Cp1500</b> |    | C4H8JSH(9) | [CH2]C(C)(C)S         | 89.18  |
|     | 23.01 89.28 29.76 40.99 55.88 63.48        |                                                                                     |            |                       |        |
| 10. | <b>H298 S298 Cp300 Cp500 Cp1000 Cp1500</b> |    | C4H9SJ(10) | CC(C)(C)[S]           | 89.18  |
|     | 9.73 80.98 27.32 39.29 56.37 64.66         |                                                                                     |            |                       |        |
| 11. | <b>H298 S298 Cp300 Cp500 Cp1000 Cp1500</b> | $\cdot\text{HS}$                                                                    | HSJ(11)    | [SH]                  | 33.07  |
|     | 33.30 46.76 7.74 7.50 7.90 8.33            |                                                                                     |            |                       |        |
| 12. | <b>H298 S298 Cp300 Cp500 Cp1000 Cp1500</b> | $\text{HS}-\text{SH}$                                                               | HSSH(12)   | SS                    | 66.15  |
|     | 3.40 60.38 11.88 14.19 16.80 17.86         |                                                                                     |            |                       |        |
| 15. | <b>H298 S298 Cp300 Cp500 Cp1000 Cp1500</b> |    | C4H9(15)   | C[C](C)C              | 57.11  |
|     | 11.90 74.29 22.20 31.86 49.45 58.50        |                                                                                     |            |                       |        |
| 18. | <b>H298 S298 Cp300 Cp500 Cp1000 Cp1500</b> |  | C8H17S(18) | [CH2]C(C)(C)SC(C)(C)C | 145.29 |
|     | 3.93 113.73 51.72 75.24 107.15 121.86      |                                                                                     |            |                       |        |
| 19. | <b>H298 S298 Cp300 Cp500 Cp1000 Cp1500</b> | $\text{H}\cdot$                                                                     | H(19)      | [H]                   | 1.01   |
|     | 52.10 27.42 4.97 4.97 4.97 4.97            |                                                                                     |            |                       |        |
| 28. | <b>H298 S298 Cp300 Cp500 Cp1000 Cp1500</b> |  | C4H7(28)   | [CH2]C(=C)C           | 55.10  |
|     | 32.30 69.61 20.96 30.41 44.29 51.20        |                                                                                     |            |                       |        |
| 39. | <b>H298 S298 Cp300 Cp500 Cp1000 Cp1500</b> |  | C8H17S(39) | C[C](C)CSC(C)(C)C     | 145.29 |
|     | -2.52 119.94 50.60 72.49 105.21 121.58     |                                                                                     |            |                       |        |
| 40. | <b>H298 S298 Cp300 Cp500 Cp1000 Cp1500</b> |  | C4H9S(40)  | C[C](C)CS             | 89.18  |
|     | 21.24 90.84 27.52 37.55 54.89 63.60        |                                                                                     |            |                       |        |
| 64. | <b>H298 S298 Cp300 Cp500 Cp1000 Cp1500</b> |  | C6H9(64)   | [CH]1C=CCCC1          | 81.14  |
|     | 30.04 73.79 24.28 39.39 61.84 71.86        |                                                                                     |            |                       |        |
| 71. | <b>H298 S298 Cp300 Cp500 Cp1000 Cp1500</b> |                                                                                     | C6H11(71)  | [CH]1CCCCC1           | 83.15  |

13.90 79.55 25.48 42.63 71.37 83.40

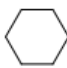

|      |                                                                                       |  |            |                       |        |
|------|---------------------------------------------------------------------------------------|--|------------|-----------------------|--------|
| 75.  | <b>H298 S298 Cp300 Cp500 Cp1000 Cp1500</b><br>3.22 117.66 54.75 84.93 128.79 146.16   |  | S(75)      | CC(C)(C)SC1[CH]CCCC1  | 171.32 |
| 80.  | <b>H298 S298 Cp300 Cp500 Cp1000 Cp1500</b><br>24.85 91.46 31.36 49.66 77.82 88.55     |  | C6H11S(80) | SC1[CH]CCCC1          | 115.22 |
| 99.  | <b>H298 S298 Cp300 Cp500 Cp1000 Cp1500</b><br>-10.22 105.00 47.59 77.91 122.63 140.83 |  | C10H19(99) | CC(C)(C)C1[CH]CCCC1   | 139.26 |
| 102. | <b>H298 S298 Cp300 Cp500 Cp1000 Cp1500</b><br>25.00 72.52 22.69 37.52 58.02 67.54     |  | C6H8(102)  | C1C=CCCC=1            | 80.13  |
| 127. | <b>H298 S298 Cp300 Cp500 Cp1000 Cp1500</b><br>19.42 111.77 44.93 70.84 110.51 128.77  |  | S(127)     | C[C](C)CC1C=CCCC1     | 137.24 |
| 132. | <b>H298 S298 Cp300 Cp500 Cp1000 Cp1500</b><br>-3.75 48.82 51.82 78.48 115.93 131.64   |  | S(132)     | CC1(C)CC2CCC[CH]C21   | 137.24 |
| 134. | <b>H298 S298 Cp300 Cp500 Cp1000 Cp1500</b><br>21.04 108.62 47.62 83.17 135.80 156.34  |  | S(134)     | [CH]1CCCCC1C1C=CCCC1  | 163.28 |
| 137. | <b>H298 S298 Cp300 Cp500 Cp1000 Cp1500</b><br>-2.44 31.59 60.74 91.31 134.96 153.47   |  | S(137)     | [CH]1CCCC2C1C1CCCCC21 | 163.28 |
| 146. | <b>H298 S298 Cp300 Cp500 Cp1000 Cp1500</b><br>4.50 106.83 46.90 80.36 126.44 147.54   |  | S(146)     | C1=CC(CCC1)C1C=CCCC1  | 162.27 |
| 239. | <b>H298 S298 Cp300 Cp500 Cp1000 Cp1500</b><br>66.13 82.29 25.93 39.91 59.11 69.39     |  | C6H8(239)  | [CH2]C=CC=C[CH2]      | 80.13  |
| 241. | <b>H298 S298 Cp300 Cp500 Cp1000 Cp1500</b><br>48.64 70.60 22.31 35.69 54.42 62.58     |  | C6H7(241)  | [CH]1C=CC=CC1         | 79.12  |
| 253. | <b>H298 S298 Cp300 Cp500 Cp1000 Cp1500</b><br>14.80 108.50 54.90 83.54 119.48 136.64  |  | S(253)     | CC(C)(C)SC1C=C[CH]CC1 | 169.31 |

|       |                                                                                      |                                                                                     |            |                        |        |
|-------|--------------------------------------------------------------------------------------|-------------------------------------------------------------------------------------|------------|------------------------|--------|
| 254.  | <b>H298 S298 Cp300 Cp500 Cp1000 Cp1500</b><br>28.25 116.75 54.90 82.66 118.44 135.22 |    | S(254)     | CC(C)(C)SC1[CH]CCC=C1  | 169.31 |
| 268.  | <b>H298 S298 Cp300 Cp500 Cp1000 Cp1500</b><br>-20.47 42.17 49.75 76.81 112.35 127.74 |    | S(268)     | CC1(C)CC2C=CC1CC2      | 136.23 |
| 275.  | <b>H298 S298 Cp300 Cp500 Cp1000 Cp1500</b><br>-19.16 24.94 58.54 89.71 131.29 149.49 |    | S(275)     | C1=CC2CCC1C1CCCCC21    | 162.27 |
| 289.  | <b>H298 S298 Cp300 Cp500 Cp1000 Cp1500</b><br>8.47 22.80 55.15 85.01 123.63 140.51   |    | S(289)     | C1=CC2C3C=CC(CC3)C2CC1 | 160.26 |
| 312.  | <b>H298 S298 Cp300 Cp500 Cp1000 Cp1500</b><br>56.01 78.16 24.87 38.33 57.36 66.37    |    | C6H8(312)  | C=CC1C=CC1             | 80.13  |
| 316.  | <b>H298 S298 Cp300 Cp500 Cp1000 Cp1500</b><br>39.64 79.36 28.08 41.82 58.08 66.37    |    | C6H8(316)  | C=CC=CC=C              | 80.13  |
| 781.  | <b>H298 S298 Cp300 Cp500 Cp1000 Cp1500</b><br>49.97 72.25 17.66 26.89 42.31 50.05    |  | C4H7(781)  | C[C]1CC1               | 55.10  |
| 1143. | <b>H298 S298 Cp300 Cp500 Cp1000 Cp1500</b><br>34.31 7.59 26.10 40.36 58.51 66.46     |  | C6H7(1143) | [CH]1C=CC2CC12         | 79.12  |
| 1146. | <b>H298 S298 Cp300 Cp500 Cp1000 Cp1500</b><br>19.80 64.36 19.90 33.06 50.07 57.93    |  | C6H6(1146) | C1=CC=CC=C1            | 78.11  |
| 1549. | <b>H298 S298 Cp300 Cp500 Cp1000 Cp1500</b><br>-0.00 31.23 6.92 6.97 7.22 7.72        | H <sub>2</sub>                                                                      | H2(1549)   | [H][H]                 | 2.02   |
| 1552. | <b>H298 S298 Cp300 Cp500 Cp1000 Cp1500</b><br>-29.50 69.71 27.27 46.47 76.01 88.39   |  | S(1552)    | C1CCCCC1               | 84.16  |
| 1594. | <b>H298 S298 Cp300 Cp500 Cp1000 Cp1500</b><br>7.33 36.59 49.30 72.72 105.06 118.30   |  | S(1594)    | CC1(C)CC2C=CC1C=C2     | 134.22 |
| 1598. | <b>H298 S298 Cp300 Cp500 Cp1000 Cp1500</b>                                           |                                                                                     | S(1598)    | C1=CC2C=CC1C1CCCCC21   | 160.26 |

8.64 19.36 57.99 85.70 123.88 140.04

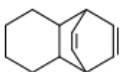

---

|       |             |             |              |              |               |               |  |         |                          |        |
|-------|-------------|-------------|--------------|--------------|---------------|---------------|--|---------|--------------------------|--------|
| 1601. | <b>H298</b> | <b>S298</b> | <b>Cp300</b> | <b>Cp500</b> | <b>Cp1000</b> | <b>Cp1500</b> |  | S(1601) | [CH]1C=CC(C=C1)C1C=CCCC1 | 159.25 |
|       | 56.29       | 100.31      | 42.78        | 74.10        | 116.12        | 135.73        |  |         |                          |        |

---

|       |             |             |              |              |               |               |  |         |                         |        |
|-------|-------------|-------------|--------------|--------------|---------------|---------------|--|---------|-------------------------|--------|
| 1608. | <b>H298</b> | <b>S298</b> | <b>Cp300</b> | <b>Cp500</b> | <b>Cp1000</b> | <b>Cp1500</b> |  | S(1608) | C1C=CC2C3C=CC(CC3)C2C=1 | 158.24 |
|       | 32.14       | 16.72       | 53.13        | 82.02        | 116.69        | 132.07        |  |         |                         |        |
