# Supplementary material for: Automatic mechanism generation for pyrolysis of di-tert-butyl sulfide
Source: Royal Society of Chemistry journal article supplement (doi:10.1039/c6cp02202b), 2016-01-01
Supplement: c6cp02202b4.pdf [file c6cp02202b4.pdf]

## Optimized geometries for species and transition states in “Automatic Mechanism Generation for Pyrolysis of Di-tert-butyl Sulfide”.

Numbers in each row are (X,Y,Z) position of that atom, in Angstroms. Values were computed using B3LYP/6-311G(2d,d,p).

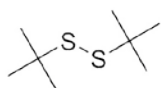

|   |             |             |             |
|---|-------------|-------------|-------------|
| C | 0.00000000  | 0.00000000  | 0.00000000  |
| C | 1.53174626  | 0.00000000  | 0.00000000  |
| H | 1.92592589  | 1.01832236  | 0.00000000  |
| H | 1.92493688  | -0.52070861 | 0.87583099  |
| H | 1.90251005  | -0.51493531 | -0.89338576 |
| C | -0.54202927 | 0.80778440  | -1.18969306 |
| H | -0.20123252 | 0.34900838  | -2.12325565 |
| H | -1.63481919 | 0.82372283  | -1.20050709 |
| H | -0.18178776 | 1.83950922  | -1.17167112 |
| C | -0.54374106 | -1.42754647 | -0.02004175 |
| H | -0.21279405 | -1.98530061 | 0.85749669  |
| H | -1.63521410 | -1.44083730 | -0.05022088 |
| H | -0.17212111 | -1.94947893 | -0.90903386 |
| S | -0.63111106 | 0.98339400  | 1.48414935  |
| S | 0.09609104  | 0.04223339  | 3.19259799  |
| C | -1.38458322 | -0.74241623 | 4.06437372  |
| C | -0.74631646 | -1.34991877 | 5.32343573  |
| H | -0.24498389 | -0.58860389 | 5.92644496  |
| H | -1.52702912 | -1.80666090 | 5.93990255  |
| H | -0.01841540 | -2.12523500 | 5.07123423  |
| C | -2.04723653 | -1.82552216 | 3.21483440  |
| H | -2.88218394 | -2.26783007 | 3.76985546  |
| H | -2.44561842 | -1.40810813 | 2.28868822  |
| H | -1.34576804 | -2.62387789 | 2.96389436  |
| C | -2.39271200 | 0.34729500  | 4.44180242  |
| H | -3.22320063 | -0.09451262 | 5.00381393  |
| H | -1.92769145 | 1.11707197  | 5.06112247  |
| H | -2.80612580 | 0.82591672  | 3.55139436  |

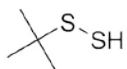

|   |             |            |            |
|---|-------------|------------|------------|
| S | 0.00000000  | 0.00000000 | 0.00000000 |
| H | 1.34910281  | 0.00000000 | 0.00000000 |
| S | -0.32838525 | 2.05923063 | 0.00000000 |

|   |             |            |             |
|---|-------------|------------|-------------|
| C | -0.40869231 | 2.56780253 | -1.81069407 |
| C | -0.67837559 | 4.07854387 | -1.72384694 |
| H | 0.13115556  | 4.60320742 | -1.21005212 |
| H | -0.75806808 | 4.48959055 | -2.73500045 |
| H | -1.61464630 | 4.28986572 | -1.20097846 |
| C | -1.56056946 | 1.84866622 | -2.51623311 |
| H | -1.62224158 | 2.18048333 | -3.55850056 |
| H | -1.40887513 | 0.76718250 | -2.51795843 |
| H | -2.51502017 | 2.06155839 | -2.03025076 |
| C | 0.92680901  | 2.29269502 | -2.50457567 |
| H | 0.88578927  | 2.64280492 | -3.54174937 |
| H | 1.74864135  | 2.80740598 | -2.00159508 |
| H | 1.14833010  | 1.22318299 | -2.52521203 |

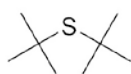

|   |             |             |             |
|---|-------------|-------------|-------------|
| S | 0.00000000  | 0.00000000  | 0.00000000  |
| C | 1.87814002  | 0.00000000  | 0.00000000  |
| C | 2.20259938  | 1.50563151  | 0.00000000  |
| H | 1.85449145  | 1.98717265  | 0.91606492  |
| H | 3.28634454  | 1.64362073  | -0.07354299 |
| H | 1.74091962  | 2.01374297  | -0.85058639 |
| C | 2.43921604  | -0.63514712 | -1.28124718 |
| H | 3.52706678  | -0.50226186 | -1.31452201 |
| H | 2.23434425  | -1.70445158 | -1.33420995 |
| H | 2.01051579  | -0.16401703 | -2.16790698 |
| C | 2.48910505  | -0.64977689 | 1.24617685  |
| H | 2.32937681  | -1.72922847 | 1.26887420  |
| H | 3.57233969  | -0.48220085 | 1.24871886  |
| H | 2.07766860  | -0.21863671 | 2.16074187  |
| C | -0.73077322 | -1.67601539 | 0.42933793  |
| C | -2.20063625 | -1.50848220 | 0.00080060  |
| H | -2.76223012 | -2.40921798 | 0.26957447  |
| H | -2.66886846 | -0.65831191 | 0.50358086  |
| H | -2.28553145 | -1.35737462 | -1.07725065 |
| C | -0.67513025 | -1.94171716 | 1.94133548  |
| H | 0.34671026  | -2.06599466 | 2.29993434  |
| H | -1.13127698 | -1.12000682 | 2.49688096  |
| H | -1.22473215 | -2.86096765 | 2.17607031  |
| C | -0.10381502 | -2.83460196 | -0.35362307 |
| H | -0.11948588 | -2.64199797 | -1.42798578 |
| H | 0.92683446  | -3.02728341 | -0.05051485 |
| H | -0.67422393 | -3.75125015 | -0.16421380 |

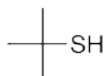

|   |             |            |            |
|---|-------------|------------|------------|
| S | 0.00000000  | 0.00000000 | 0.00000000 |
| C | 1.87105968  | 0.00000000 | 0.00000000 |
| H | -0.16002107 | 1.33513629 | 0.00000000 |
| C | 2.39313028  | 0.69614930 | 1.26279000 |

|   |            |             |             |
|---|------------|-------------|-------------|
| H | 3.48823221 | 0.65836892  | 1.28580800  |
| H | 2.09529240 | 1.74757402  | 1.28963200  |
| H | 2.01218154 | 0.21296246  | 2.16433100  |
| C | 2.27213608 | -1.48254056 | 0.00000000  |
| H | 1.89289651 | -1.99753010 | -0.88606200 |
| H | 3.36315531 | -1.56723573 | -0.00000000 |
| H | 1.89289651 | -1.99753010 | 0.88606200  |
| C | 2.39313028 | 0.69614930  | -1.26279000 |
| H | 3.48823221 | 0.65836892  | -1.28580800 |
| H | 2.01218154 | 0.21296246  | -2.16433100 |
| H | 2.09529240 | 1.74757402  | -1.28963200 |

H<sub>2</sub>S<sub>2</sub>

|   |             |            |             |
|---|-------------|------------|-------------|
| S | 0.00000000  | 0.00000000 | 0.00000000  |
| H | 1.34788024  | 0.00000000 | 0.00000000  |
| S | -0.29725724 | 2.07647703 | 0.00000000  |
| H | -0.34188265 | 2.26304396 | -1.33415985 |

H<sub>2</sub>S

|   |             |            |            |
|---|-------------|------------|------------|
| S | 0.00000000  | 0.00000000 | 0.00000000 |
| H | 1.34327993  | 0.00000000 | 0.00000000 |
| H | -0.06054407 | 1.34191482 | 0.00000000 |

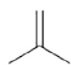

|   |             |             |             |
|---|-------------|-------------|-------------|
| C | -0.00028400 | -0.00000400 | -0.00010500 |
| H | -0.00131600 | -0.00003500 | 1.08471800  |
| H | 0.96837900  | 0.00002300  | -0.48847800 |
| C | -1.13511100 | -0.00000100 | -0.69953000 |
| C | -1.14823900 | 0.00001900  | -2.20683000 |
| H | -1.67778200 | -0.87868600 | -2.59328600 |
| H | -1.67799900 | 0.87859800  | -2.59327200 |
| H | -0.13852100 | 0.00014600  | -2.62098000 |
| C | -2.48731800 | -0.00001600 | -0.03385200 |
| H | -3.07084000 | -0.87856300 | -0.33307100 |
| H | -2.40315500 | -0.00016500 | 1.05430200  |
| H | -3.07073000 | 0.87868600  | -0.33283400 |

**Transition State 1**

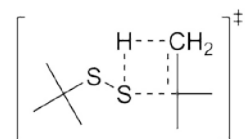

|   |             |             |             |
|---|-------------|-------------|-------------|
| S | -0.45839400 | -0.52516100 | 0.05632700  |
| C | -3.31620400 | 0.20533100  | 0.06623100  |
| C | 2.59814500  | 0.30246600  | -0.01958200 |
| C | -3.31554300 | 1.60687200  | -0.45126700 |
| H | -3.01728200 | 1.65358700  | -1.50074400 |
| H | -4.33705000 | 2.01570600  | -0.39294400 |

|   |             |             |             |
|---|-------------|-------------|-------------|
| H | -2.66521300 | 2.25818900  | 0.13390600  |
| C | -2.91839800 | -0.07767400 | 1.39827600  |
| H | -2.90233300 | 0.77198500  | 2.08108700  |
| H | -3.34007200 | -0.98214700 | 1.83778000  |
| H | -1.72556500 | -0.38025500 | 1.33888700  |
| C | -3.90590700 | -0.86322400 | -0.79539300 |
| H | -3.62736700 | -0.74192200 | -1.84409300 |
| H | -3.61353700 | -1.85995000 | -0.46306900 |
| H | -5.00508500 | -0.80317700 | -0.74684200 |
| S | 1.46266800  | -1.19260200 | -0.19560300 |
| C | 4.00358100  | -0.27561200 | -0.23807100 |
| H | 4.10131300  | -0.72435100 | -1.23005000 |
| H | 4.74727900  | 0.52375500  | -0.15465000 |
| H | 4.24301900  | -1.03762800 | 0.50821900  |
| C | 2.46363300  | 0.89544600  | 1.38513200  |
| H | 3.13393900  | 1.75575500  | 1.49388800  |
| H | 1.44153100  | 1.23448700  | 1.56745600  |
| H | 2.72167700  | 0.15975600  | 2.15057400  |
| C | 2.26271700  | 1.34228700  | -1.09135400 |
| H | 2.93255600  | 2.20476900  | -0.99810800 |
| H | 2.37656600  | 0.92497400  | -2.09457800 |
| H | 1.23510800  | 1.69533300  | -0.98213800 |

### Transition State 2

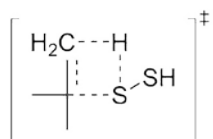

|   |             |             |             |
|---|-------------|-------------|-------------|
| S | -0.93890900 | 0.01391800  | 0.08119400  |
| C | 1.95720000  | -0.00005200 | 0.06361200  |
| C | 2.26126100  | -1.29890400 | -0.60946400 |
| H | 1.99787800  | -1.28034700 | -1.66856200 |
| H | 3.34484900  | -1.48808000 | -0.55119200 |
| H | 1.75163300  | -2.13480100 | -0.12931400 |
| C | 1.52886400  | 0.03079800  | 1.41395500  |
| H | 1.71336000  | -0.87262000 | 1.99510400  |
| H | 1.72666800  | 0.95406300  | 1.95821600  |
| H | 0.28859200  | 0.03419400  | 1.37164100  |
| C | 2.29104500  | 1.26373900  | -0.66041400 |
| H | 2.01953500  | 1.21203400  | -1.71642100 |
| H | 1.80919900  | 2.13172500  | -0.20924700 |
| H | 3.37984800  | 1.42487600  | -0.61716700 |
| S | -2.99683000 | -0.08790200 | -0.17264700 |
| H | -3.28995100 | 1.22921100  | -0.21593500 |

### Transition State 3

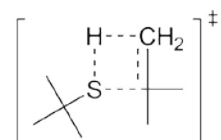

|   |            |            |            |
|---|------------|------------|------------|
| C | 0.00000000 | 0.00000000 | 0.00000000 |
|---|------------|------------|------------|

|   |             |             |             |
|---|-------------|-------------|-------------|
| S | 1.86193637  | 0.00000000  | 0.00000000  |
| C | 4.70275716  | 0.56102696  | 0.00000000  |
| C | -0.51872846 | -0.52533934 | -1.34662509 |
| H | -0.17902407 | -1.54887888 | -1.52299364 |
| H | -1.61600641 | -0.52250200 | -1.36483231 |
| H | -0.15790820 | 0.09436849  | -2.17042559 |
| C | -0.45669312 | 1.45352517  | 0.20975502  |
| H | -1.55252457 | 1.50478661  | 0.21532694  |
| H | -0.09219605 | 1.84769794  | 1.16142631  |
| H | -0.09119602 | 2.10117455  | -0.59114951 |
| C | -0.51111361 | -0.88297697 | 1.14812724  |
| H | -1.60833794 | -0.88663774 | 1.16984435  |
| H | -0.17124458 | -1.91480953 | 1.02864212  |
| H | -0.14680723 | -0.51856316 | 2.11103019  |
| C | 4.84619430  | 1.36490255  | -1.24787407 |
| H | 4.40075761  | 2.35557321  | -1.14987084 |
| H | 5.92018475  | 1.50768131  | -1.45011597 |
| H | 4.41089803  | 0.85577207  | -2.10776725 |
| C | 4.59467114  | -0.85661430 | -0.06451875 |
| H | 4.91736943  | -1.31059680 | -1.00149556 |
| H | 4.92927557  | -1.39486080 | 0.82220031  |
| H | 3.40123826  | -1.04608974 | -0.06733497 |
| C | 4.86965159  | 1.24805200  | 1.31300879  |
| H | 4.41448089  | 2.23919335  | 1.31655676  |
| H | 4.45922939  | 0.65842321  | 2.13271654  |
| H | 5.94706450  | 1.38273441  | 1.50236674  |

#### Transition State 4

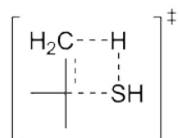

|   |             |             |             |
|---|-------------|-------------|-------------|
| S | -1.92623500 | -0.00000700 | -0.20784200 |
| C | 0.98833500  | 0.00000100  | 0.12266400  |
| C | 1.33771200  | -1.28239900 | -0.54734700 |
| H | 1.21395300  | -1.22751900 | -1.62905800 |
| H | 2.40077700  | -1.49509000 | -0.34799900 |
| H | 0.75405900  | -2.11478500 | -0.15397400 |
| C | 0.46256800  | 0.00002100  | 1.44791700  |
| H | 0.63332300  | -0.91314200 | 2.01807900  |
| H | 0.63342900  | 0.91316700  | 2.01807700  |
| H | -0.71572900 | 0.00009600  | 1.26811100  |
| C | 1.33761300  | 1.28240900  | -0.54738500 |
| H | 1.21394400  | 1.22746700  | -1.62910200 |
| H | 0.75384100  | 2.11474700  | -0.15408700 |
| H | 2.40064200  | 1.49522300  | -0.34796400 |
| H | -3.22584800 | -0.00024700 | -0.57170500 |
